# Supplementary material
Source: publisher figshare collection journal article supplement (https://tandf.figshare.com/articles/dataset/_/24942245)
Supplement: Supplementary file 1 [file 1]

**Supplementary Table 1. ELISA kit used in this study**

|                      |                |               |
|----------------------|----------------|---------------|
| IL-1 $\beta$ (human) | Beyotime       | PI305         |
| IL-1 $\beta$ (mouse) | Thermo Fisher  | BMS6002       |
| IL-18 (human)        | Beyotime       | PI558         |
| IL-18 (mouse)        | HAKATA         | HM-022        |
| TT                   | GoldenRain/sbj | SBJ-R0844-48T |
| FT                   | CUSABIO        | CSB-E05098m   |
| LH                   | JLbio          | JL10432-48T   |
| FSH                  | Sangon Biotech | D721074-0096  |
