# Supplementary material
Source: publisher figshare collection journal article supplement (https://tandf.figshare.com/articles/dataset/_/24942245)
Supplement: Supplementary file 2 [file 1]

**Supplementary Table 2. Antibodies used in this study**

|                   |          |          |
|-------------------|----------|----------|
| NLRP3             | Abcam    | Ab263899 |
| Cleaved-caspase 3 | Beyotime | AF2815   |
| GAPDH             | Beyotime | AF0006   |
